1 The human sperm head spins with a conserved direction during swimming in 3D

2

3 Corkidi G.<sup>1\*</sup>, Montoya F.<sup>1</sup>, González-Cota A.L.<sup>2</sup>, Hernández-Herrera P.<sup>3</sup>, Bruce N.C.<sup>4</sup>,

4 Bloomfield-Gadêlha H.<sup>5\*</sup>, Darszon A.<sup>2\*</sup>

5

6 <sup>1</sup>Laboratorio de Imágenes y Visión por Computadora, Departamento de Ingeniería Celular

7 y Biocatálisis, <sup>2</sup>Departamento de Genética del Desarrollo y Fisiología Molecular, y

8 <sup>3</sup>Laboratorio Nacional de Microscopía Avanzada, Instituto de Biotecnología, Universidad

9 Nacional Autónoma de México, Cuernavaca, 62210, México; <sup>4</sup>Instituto de Ciencias

10 Aplicadas y Tecnología, Universidad Nacional Autónoma de México, Circuito Exterior S/N,

11 Ciudad Universitaria, 04510, Ciudad de México, México; <sup>5</sup>Department of Engineering

12 Mathematics & Bristol Robotics Laboratory, University of Bristol, UK.

13

14 **\*Corresponding authors:**

15 Emails: [gabriel.corkidi@ibt.unam.mx](mailto:gabriel.corkidi@ibt.unam.mx), [hermes.gadelha@bristol.ac.uk](mailto:hermes.gadelha@bristol.ac.uk);

16 [alberto.darszon@ibt.unam.mx](mailto:alberto.darszon@ibt.unam.mx)

17

## 18 **Abstract**

19 In human sperm, head spinning is essential for sperm swimming and critical for

20 fertilization. Measurement of head spinning has not been straightforward due to its

21 symmetric head morphology, its translucent nature and fast 3D motion driven by its helical

22 flagellum movement. Microscope image acquisition has been mostly restricted to 2D single

23 focal plane images limited to head position tracing, in absence of head orientation and

24 rotation in 3D. To date, human sperm spinning has been reported to be mono or

25 bidirectional, and even intermittently changing direction. This variety in head spinning

26 direction, however, appears to contradict observations of conserved helical beating of the

27 human sperm flagellum. Here, we reconcile these observations by directly measuring the  
28 head spinning movement of freely swimming human sperm with multi-plane 4D  
29 microscopy. We show that 2D microscopy is unable to distinguish the spinning direction in  
30 human sperm. We evaluated the head spinning of 409 spermatozoa in four different  
31 conditions: in non-capacitating and capacitating solutions, for both aqueous and viscous  
32 media. All spinning spermatozoa, regardless of the experimental conditions spun  
33 counterclockwise (CCW) as seen from head-to-tail. Head spinning was suppressed in 57%  
34 of spermatozoa swimming in non-capacitating viscous media, though, interestingly, they  
35 recovered the CCW spinning after incubation in capacitating conditions within the same  
36 viscous medium. Our observations show that the spinning direction in human sperm is  
37 conserved, even when recovered from non-spin, indicating the presence of a robust and  
38 persistent helical driving mechanism powering the human sperm flagellum, thus of critical  
39 importance in future sperm motility assessments, human reproduction research and  
40 microorganism self-organised swimming.

41

## 42 **Introduction**

43 Mammalian spermatozoa invariably spin as they freely swim through a fluid. Similarly to a  
44 drill, coordinated helical motion of its whip-like flagellum causes the sperm to “corkscrew”  
45 into the fluid, causing the sperm head to spin around its longitudinal axis during locomotion  
46 (David et al., 1981; Denehy et al., 1975; Ishijima et al., 1992; Linnet, 1979; Phillips et al.,  
47 1972; Rikmenspoel, 1965; Woolley, 1977). Sperm head spinning is a direct manifestation  
48 of the cyclic molecular-motor activity shaping the flagellum into a helical beat in 3D  
49 (Woolley, 1977; Woolley et al., 1984): a right-handed helical flagellum causes the sperm  
50 head to spin clockwise (CW) whilst a left-handed sperm spins in the opposite direction  
51 when seen from head-to-tail. Sperm spinning is suppressed if the flagellar waveform is

52 purely planar (2D), as observed for human sperm penetrating viscous medium (Smith et  
53 al., 2009). The spinning ability has also been reported to be critical for a successful  
54 fertilization, related to a complex cascade of trans-membrane ion channel transport that  
55 coordinates this mode of motion (Miller et al., 2018; Zhao et al., 2022). Head spinning is  
56 thus a fundamental feature linking the molecular workings of the flagellar beat with sperm  
57 motion, and thus an important proxy of symmetry, or rather symmetry-breaking, of the  
58 helical flagellar movement in 3D (Zaferani et al., 2021).

59 For the past 50 years researchers have attempted to quantify and define the spinning  
60 direction of the human sperm head, though, until now, there is no consensus in the  
61 literature of its spinning directionality. Human sperm spinning has been observed to be  
62 mono-directed (Linnet, 1979; Smith et al., 2009b; Phillips, 1983; Woolley, 1977), bi-  
63 directed (Ishijima et al., 1992; Dardikman-Yoffe et al., 2020; Drake, 1974), and even  
64 intermittently directed (Bukatin et al., 2015). However, such reported variety in spinning  
65 direction appears to contradict observations of a conserved helical beating of human  
66 sperm flagellum (Bukatin et al., 2015; Ishijima et al., 1992; Linnet, 1979; Powar et al.,  
67 2022; Zhao et al., 2022), and conserved chirality of structural components in mammalian  
68 sperm flagella (Fawcett, 1975; Leung et al., 2021), with no agreement as to the direction of  
69 rotation reported in earlier studies (Woolley, 1977; Bishop, 1958; Drake, 1974; Yeung and  
70 Woolley, 1984; Woolley, 1979; Blokhuis, 1961; Daloglu et al., 2018).

71

72 The human sperm head is translucent and has an axis-symmetric morphology around its  
73 spinning axis (Figure 1), making it prone to optical illusions that may obscure accurate  
74 detection of its spinning directionality. As such, the sperm head is prone to perception  
75 bistability which can further disguise the true spinning direction in translucent objects (Liu  
76 et al., 2012). This optical illusion causes spinning translucent objects to appear to oscillate

77 back-and-forth or spin with a switchable, and thus undefined, direction (Liu et al., 2012). At  
78 microscale this difficulty is augmented by the contrast inversion effect due to spherical  
79 aberrations in microscope objectives that cause a contrast-switch depending on the  
80 object's relative position to the plane of focus (Keller et al., 2022; Goodman, 2005).  
81 Switching the contrast of spinning objects and its subsequent dependence on the focal  
82 plane used for imaging, have unknown consequences on the detected direction of  
83 spinning (Figure 2), as we further detail in this paper. Altogether, these challenges indicate  
84 that 2D microscopy may not provide accurate measurement of the directionality of sperm  
85 head spinning (Muschol et al., 2018). Incidentally, *direct* detection of the head spinning  
86 direction in human sperm has been limited thus far to single-plane 2D microscopy. Indirect  
87 detection methods either exploit the sperm head centre-position traces (Ishijima et al.,  
88 1992) or flagelloid tracks in 3D (Ishijima et al., 1992; Bukatin et al., 2015; Dardikman-Yoffe  
89 et al., 2020), by following the trajectory of a certain point along the flagellum. In this case,  
90 the head spinning direction is assumed to follow similar rotational movement of the  
91 position traces of these counterparts. Indirect detection studies however have not yet been  
92 validated against direct measurements of head spinning, as no ground truth is available for  
93 this, highlighting this is an urgent gap in literature. Furthermore, different rotations are  
94 present during sperm swimming and it is a challenging task to infer head spinning  
95 indirectly from flagellar tracks that rotate around an average swimming axis, or from  
96 flagelloid tracers that are ill posed and cannot define robustly a common rotation point.  
97 Indeed, no modern 3D flagellar tracking research has attempted to directly track the head  
98 spinning direction in human sperm. This is, however, critical for understanding sperm  
99 swimming as human sperm precesses around its swimming axis: the sperm head spins at  
100 the same time that the cell as a whole rotates around its swimming direction.

101

102

103

104

105

106

107

108

109

110

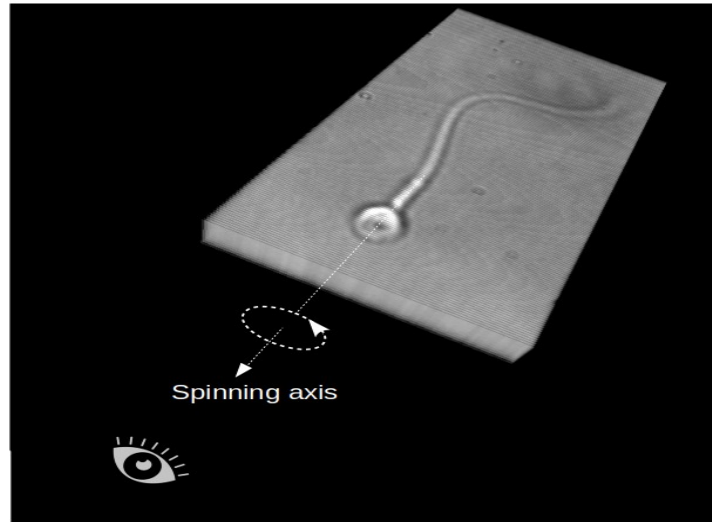

111

112

113 Figure 1. The human sperm head is translucent and has an axis-symmetric morphology

114 around its spinning axis. The reference of observation in this work is from head to tail.

115

116 Here we solve this half-century old problem using a high-resolution multi-plane 4D method  
117 (Corkidi et al., 2008; Silva-Villalobos et al., 2014; Pimentel et al., 2012; Corkidi et al.,  
118 2021; Gadêlha et al., 2020; Hernández et al., 2022) to directly detect the head spinning  
119 direction of human spermatozoa. This method employs 4D bright-field microscopy with a  
120 100x high-magnification objective that scans a 3D volume with high-speeds as sperm spin  
121 and swim through the fluid. The high-precision 4D microscopy described here provides a  
122 dense stack of multiple focal planes that bypass limitations of: (i) 2D microscopy that only  
123 uses a single focal plane, (ii) the image dependence on focal plane positioning, (iii)  
124 difficulties arising from contrast-switch of spherical aberrations of the lens, and (iv)  
125 perception bistability effect of translucent spinning objects. We additionally show that head  
126 sperm spinning direction cannot be confidently deduced from a single focal plane imaging.  
127 We analyzed over 400 free-swimming human spermatozoa in four different conditions,  
128 using capacitating and non-capacitating solutions within aqueous and viscous media.  
129 100% of all sperm heads were observed to spin counterclockwise (CCW) when viewed  
130 from head-to-tail, Figure 1. Our observations show that the spinning direction in human  
131 sperm is conserved, even when head spinning is recovered from planar beating, indicating  
132 the presence of a persistent helical driving mechanism powering the human sperm  
133 flagellum. These observations may have important implications concerning the internal  
134 machinery driving the head spinning, flagellum-powered cell motility and its physiology.

135

## 136 **RESULTS**

137

### 138 **a) 2D single-plane imaging cannot inform confidently the direction of head spin**

139

140 Classical 2D single-plane imaging is not suitable to establish confidently the direction of  
141 the head spin. Figure 2 shows an image sequence of 17 timepoints evolving from left to  
142 right at two different focal planes containing the information of a complete head turn. As  
143 can be appreciated, the visual information in these two planes is distinct and complex, with  
144 changes in the brightness, contrast switches and head position relative to the focal plane.  
145 Establishing the head spinning direction is not possible using single-plane information  
146 alone (see Video 1). Visual inspection by different observers leads to different spinning  
147 directions due to bistability perception.  
148

149

150

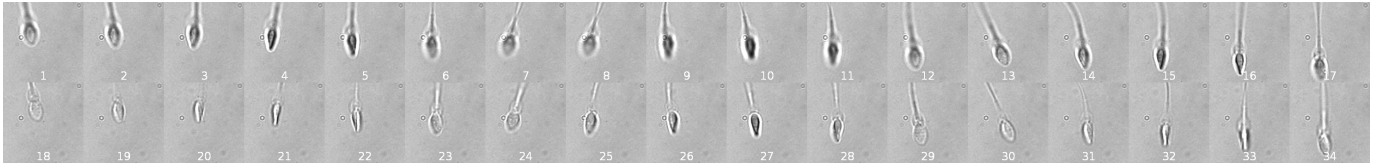

151 Figure 2. Image sequence of 17 timepoints at two different focal planes separated by 4.8  
152 microns (image 1-17 upper focal plane, images 18-34 lower focal plane), containing the  
153 information of a complete head turn (see Video 1).

154

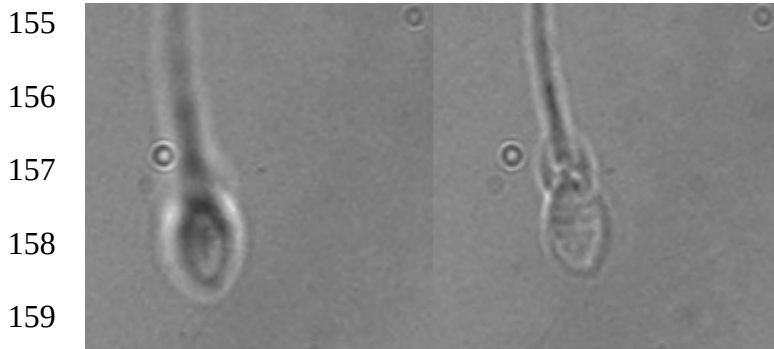

160

161 Video 1. Establishing the head spinning direction is not possible using single-plane  
162 information alone. Visual inspection by different observers leads to different spinning  
163 directions due to bistability perception.

164



165 **b) 3D bright field image stacks acquisition and contrast inversion for the human**  
166 **sperm head.**

167 Figure 3 shows 25 consecutive focal planes (out of 50) from a single piezo rising slope and  
168 assumed to correspond to a single instant. The experimental setup provides a temporal  
169 resolution of 1/160 seconds and a spatial resolution along the z direction of 0.4  $\mu\text{m}$ . In this  
170 figure, different head elements and their contrast-inversion are revealed as the focal plane  
171 moves through the sperm head, appearing as bright pixels inside the head with a dark halo  
172 outside to the head behind the focal plane (Figure 3(1)), and as dark pixels inside the head  
173 with a bright halo outside to the head in front of the focal plane (Figure 3(25)). Note  
174 particularly how the left narrowest sides of the sperm head begin to appear as a bright  
175 white border (as detailed in the next sub-sections) when images move farther from the  
176 objective lens (15 to 11) in Figure 3. This contrast inversion effect will be explored in the  
177 following section to track head spin directionality.

178

179  
180  
181  
182  
183  
184  
185  
186  
187  
188  
189

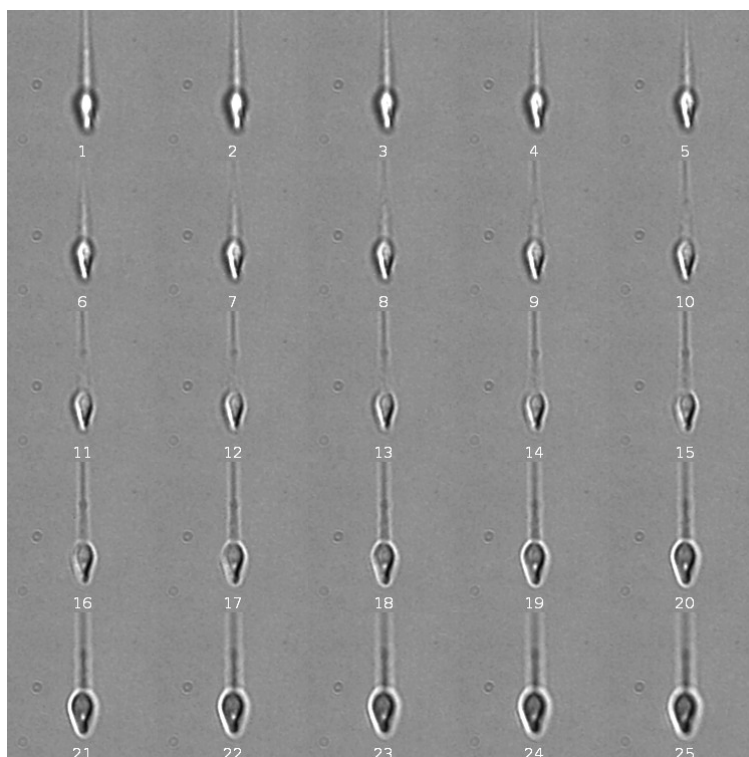

190  
191  
192  
193  
194  
195  
196

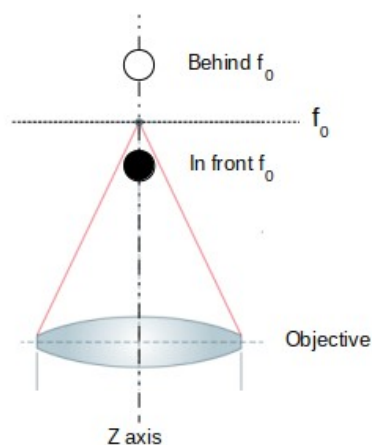

197 Figure 3. Multifocal plane acquisition. From left to right and top to bottom, this figure shows  
198 25 consecutive focal planes (out of 50) acquired while the piezoelectric device is rising.  
199 Frames (150 x 150 pixels each) were cropped, for visualization purposes, from 640 x 480  
200 pixels image sequences. Each focal plane is separated by 0.4  $\mu\text{m}$  respectively (see  
201 Materials and Methods). The schematic at the bottom depicts how the spherical aberration  
202 of the optical system produces a contrast inversion over translucent objects depending on

203 their position with respect to the focal plane  $f_0$ . The object appears dark if placed in front of  
204 the focal plane  $f_0$ , while bright if placed behind.

205 **c) Contrast inversion of the sperm head is due to the spherical aberration of the**  
206 **objective lens using bright-field microscopy.**

207 The Rayleigh-Sommerfeld back propagation reconstruction method has been commonly  
208 used to reconstruct the sperm flagellum in 3D (Bukatin et al., 2016), but this is based  
209 solely on diffraction and cannot distinguish between defocus before or after the focused  
210 object plane (Lee et al., 2007). Usually, the contrast inversion of the defocused object is  
211 used heuristically to post process the results of the back-propagation method to produce a  
212 final reconstructed object (Lee et al., 2007), alternatively, phase information from the  
213 reconstructed object can be used to post-process the reconstruction itself (Wilson et al.,  
214 2012). It is well known that microscope objectives are extremely well corrected for  
215 conjugate planes, which are focused objects and image planes, but this is not true for non-  
216 conjugate planes. Aberrations, particularly spherical aberrations, can strongly contribute to  
217 image quality for non-conjugate planes (Keller et al., 2022; Kidger, 2002). Here we  
218 demonstrate that it is the spherical aberration of the objective lens that produces a contrast  
219 inversion as a function of the position of the object relative to the focused object plane  
220 (Figure 3).

221 Diffraction effects that appear in the point spread function (PSF) are given by the Fourier  
222 transform of the lens aperture function multiplied by the aberration function,

223  
224 
$$PSF = \mathbf{F}(P(x, y) \exp(ikW(x, y))), \quad (1)$$
  
225

226 where  $\mathbf{F}()$  is the Fourier transform in the lens aperture plane,  $(x, y)$  is the position in the  
227 image plane,  $P(x, y)$  is the lens pupil (almost always taken as a circle),  $k=2\pi/\lambda$  is the  
228 light wave number, and  $W(x, y)$  is the wave aberration function given by (Goodman,  
229 2005)

230

231 
$$W(x, y) = A_d \frac{x^2 + y^2}{r^2} + A_s \left( \frac{x^2 + y^2}{r^2} \right)^2, \quad (2)$$

232

233 where  $A_d$  is the amplitude of the defocus,  $A_s$  is the amplitude of the spherical aberration,  
234 and  $r$  is the radius of the lens pupil. The first term in Equation 2 is the defocus contribution,  
235 and the second term is the contribution of the spherical aberration. One important aspect  
236 is the sign of the defocus term. From Goodman 2005, using the Gauss equation for a  
237 defocused system we have:

238

239 
$$\frac{1}{d_0} + \frac{1}{d_i} = \frac{1}{f} \rightarrow \frac{1}{d_0} + \frac{1}{d_i} - \frac{1}{f} = -A_d, \quad (3)$$

240

241 so that  $A_d = 0$  when the system is focused. Given that  $f$  and  $d_i$  (focal length and the  
242 distance from the lens to the image) are fixed, and the distance from the object to the lens  
243 ( $d_0$ ) changes when the optical system is defocused, when  $d_0$  increases (the object is

244 further away from the objective lens), the term  $\frac{1}{d_0} + \frac{1}{d_i}$  is smaller and  $A_d > 0$ . When  $d_0$

245 decreases (the object is closer to the objective lens), the term  $\frac{1}{d_0} + \frac{1}{d_i}$  increases and  $A_d < 0$ .

246 We assume that the spherical aberration has the same sign for a defocus below and  
247 above the geometrical focal plane. Simulations for a rectangular object are shown in  
248 Figure 4. The diffraction from defocus alone in Figure 4A and B, does not give an inversion  
249 of contrast between the object positions below and above the focused object plane. Figure  
250 4C and D, however, where a small spherical aberration contribution has been included,  
251 does show the contrast inversion effect. Finally, Figure 4E shows the case of an inclined  
252 object where the left part of the object is further away from the objective lens and the right

253 part is closer to the objective lens, showing the contrast inversion within the object. It is  
254 important to note that a change in sign of the spherical aberration contribution changes the  
255 contrast inversion: with  $A_s > 0$  an object closer to the objective lens than the focused  
256 object plane would be dark and an object further from the objective lens would be bright.  
257 The sign of the aberration depends on the specific design of the optical system and so  
258 could vary between different laboratories working with different objectives. Our simulations  
259 consider a spherical aberration within the range of the optical system used in our  
260 experiments.

261

262 The contrast-switch inside the object is a direct manifestation of the object's inclination  
263 relative to the objective lens (Figure 4E). Here we exploit for the first time this unique  
264 optical effect to extract the directionality of a spinning object, such as the sperm head, as  
265 detailed below. Figure 5 shows how this contrast-switch of its planar projection varies  
266 when the inclination of the object increases as the object spins around its long axis.  
267 Clockwise spinning causes the bright part (further away from the objective lens, see white  
268 arrows) of the inclined object to always move from right-to-left and the dark part to move  
269 from left-to-right (dark arrows), whilst counterclockwise spinning causes the bright region  
270 to always move from left-to-right and at the same time that the dark region moves from  
271 right-to-left. Once a half-cycle is completed, and the flat object is parallel to the objective  
272 lens, the bottom part of the object reaches the top and vice versa, re-setting the contrast  
273 inversion: any part of the object reaching the top appears as bright, likewise any part of the  
274 object reaching the bottom will appear as dark. In other words, after a half-cycle, a  
275 bright/dark region abruptly re-appears at starting location, after reaching the end of the  
276 object on the opposite side. For this reason, if an object spins in the same direction, this  
277 will be manifested in the image as the bright or dark regions of the objects moving with a

278 persistent direction relative to the object's orientation (left-to-right or right-to-left). Likewise,  
279 if the object spinning direction is reversed, the direction of motion of bright/dark regions will  
280 equally reverse relative to the object's orientation (right-to-left or left-to-right). The  
281 spherical aberration effect causing the contrast switch within the object's image allows for  
282 robust, and yet simple, detection of spinning direction of axis-symmetric objects, such as  
283 the human sperm head demonstrated below, that otherwise would not be possible, and  
284 this feature is exploited here for the first time.

285

286

287

288

289

290

291

292

293

294

295

296

297

298

299

300

301

302

303

304

305

306

307 Figure 4. Results of the simulation of image formation for a weakly scattering phase object.

308 (A) image with  $A_s=0$  and  $A_d=0.3$ ; (B) image with  $A_s=0$  and  $A_d=-0.3$ ; (C) image with

309  $A_s=-0.0004$  and  $A_d=0.04$ ; (D)  $A_s=-0.0004$  and  $A_d=-0.04$ ; (E) image for an inclined

310 planar object with  $A_s=-0.0004$ . The centre of the object plate is in the focused object plane

311 of the lens and the right part of the object is closer to the objective lens.

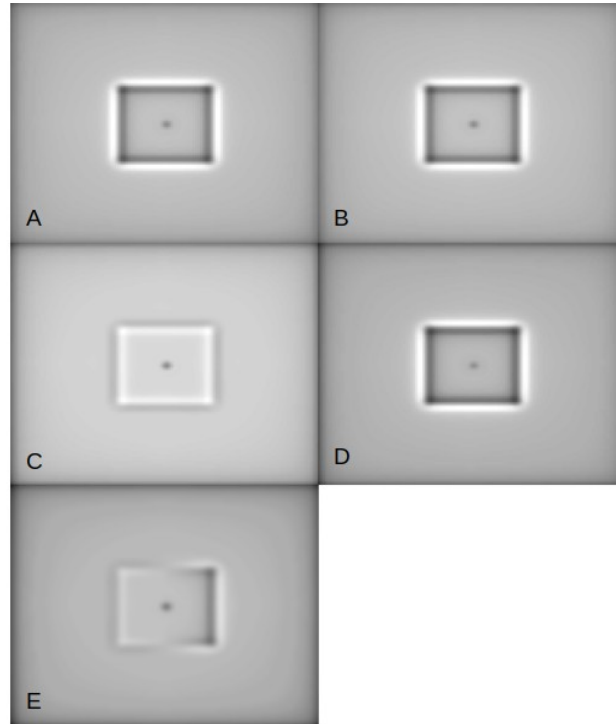



312

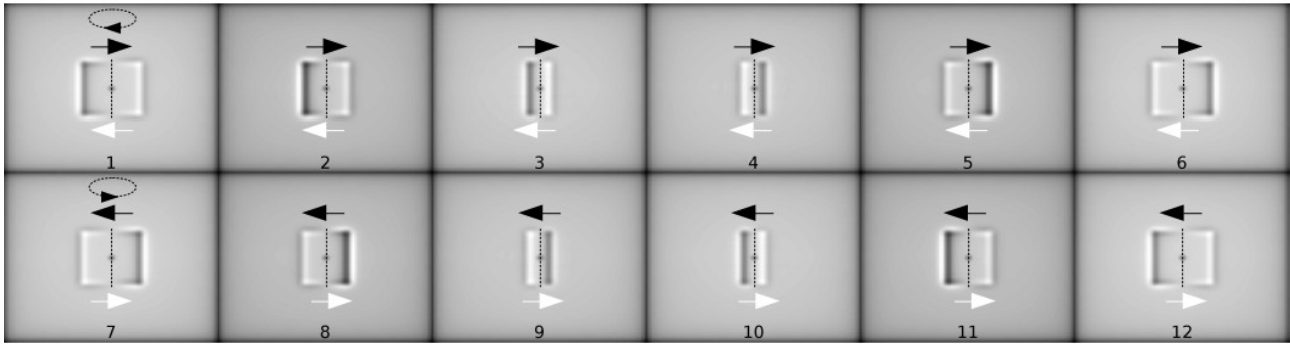

313 Figure 5. Simulation results of a spinning object, showing the direction of movement of the  
314 dark and bright left/right edges from 2D imaging from a fixed focal plane projection. Top:  
315 (images 1 to 6) a clockwise rotation viewed from the top of the images; bottom: (images 7  
316 to 12) a counterclockwise rotation.  $A_s = -0.004$  and the maximum defocus is  $A_d = \pm 0.2$ .

317 **d) Bright region induced by sperm head inclination moves with head spinning.**

318

319 The human sperm head has a flattened side, and when the head spins around its  
320 longitudinal axis, the narrow side behind the focal plane is clearly seen as a bright region,  
321 whilst the part of the head above the focal plane appears as dark, when the sperm head is  
322 inclined relative to the objective lens (Figure 6, images 4-6, see arrows). The contrast  
323 switch inside the sperm head is due to the head inclination relative to the objective lens  
324 (images 4-6); when the sperm head is parallel to the objective lens, no switch in contrast  
325 occurs (images 8-9), as demonstrated in the above section. The time-sequence in Figure 6  
326 (images 4-7), shows the bright region moving from left-to-right relative to the sperm head  
327 orientation due to changes in inclination of the sperm head caused by the head spinning.  
328 This switch in contrast when the head is inclined is barely perceptible when observed with  
329 2D microscopy (Figure 2), as the sperm head continuously changes its position relative to  
330 the focal plane when swimming freely in the fluid (see Video 1). A minimal focal change at  
331 the micron scale is sufficient to prevent the detection of bright-dark regions induced by the  
332 sperm head inclination, as shown in Figure 4E. Indeed, Figures 2 and 6 show the inversion  
333 in contrast due to inclination of the sperm head is clearly visible for only a few focal planes  
334 as the piezo rises. It would be a challenging task to change a single focal plane  
335 dynamically, at the microscale, to keep the sperm head exactly in focus to enable the  
336 detection of this change in contrast optical effect across the head using 2D microscopy, as  
337 shown in Figure 5. Our multifocal system bypasses this challenge and allows unique  
338 detection of the accumulated changes in contrast from bright-to-dark regions induced by  
339 the sperm head inclination from a stack of multiple focal planes (Figure 3), as detailed  
340 below.

341

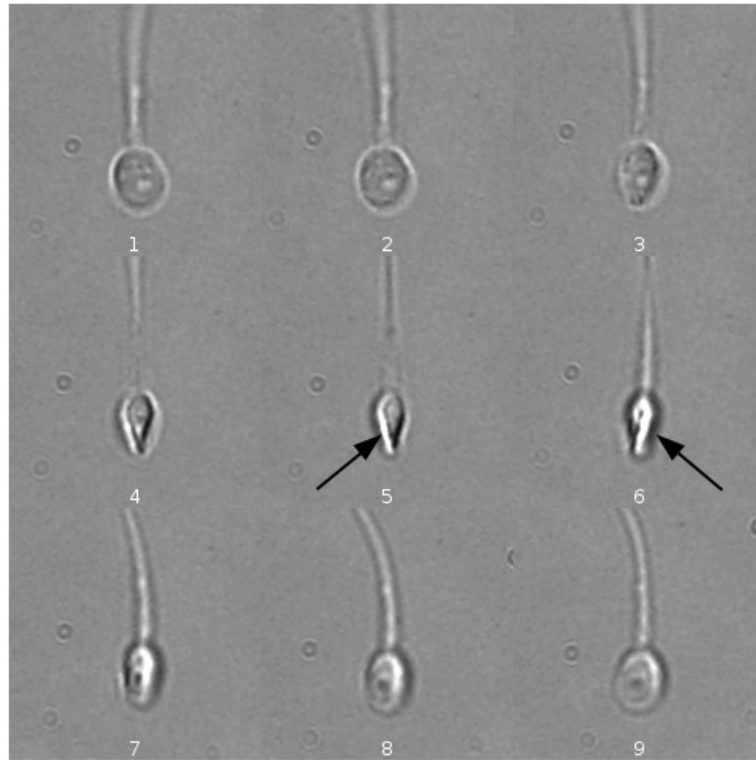

342 Figure 6. The contrast inversion optical effect during a half turn of a sperm head. Nine  
343 consecutive timepoints where the contrast inversion optical effect is clearly observed  
344 (same focal plane), i.e. the narrowest, focally lower, border of the sperm head (behind the  
345 focal plane) is enhanced resulting in a bright border while the sperm head is inclined  
346 during head spinning (highlighted with arrows).

347 **e) Validation of the sperm head spinning detection using contrast switch of the**  
348 **sperm head.**

349 We validated the use of the contrast inversion of the sperm head shown previously to  
350 detect the head spinning direction against direct tracking of the motion of a particle  
351 attached to a sperm neck during head spinning. Figure 7 shows a sperm cell with such a  
352 particle rigidly attached to its neck, whilst spinning 360 degrees during free-swimming  
353 motion. In the time-sequence for the Figure 7A, the focal plane is approximately placed  
354 between the sperm and the particle along z, in such a way that when this particle is behind  
355 the focal plane (images 1-4), it appears as bright, while when the particle is in front of the  
356 focal plane (images 5-8), it appears as dark. The arrow on the particle shows the direction  
357 of the displacement during head spinning; the black arrow indicates that the particle is  
358 behind the focal plane (bright particle), while the red arrow indicates when the particle is in  
359 front of the focal plane (dark particle). As such, the particle rotates in the CCW direction  
360 following the sperm head spinning motion: the particle moves from left-to-right when  
361 behind the focal plane (1-4), and moves from right-to-left when above the focal plane (5-8).  
362 On the other hand, the bright border arising from the contrast inversion when the sperm  
363 head is inclined relative to the objective lens always moves in the same direction relative  
364 to the sperm head orientation, from left-to-right, as shown by the arrow on this bright  
365 region, regardless of whether the particle is above (5-8) or below (1-4) the focal plane in  
366 each of its half-cycle (see Video 2). CCW spinning (as seen from head-to-tail) causes the  
367 sperm head bright region to always move from left-to-right relative to the sperm head, in  
368 agreement with the direction of the particle rotation above.

369 When the focal plane is placed between the particle and the flagellum (Figure 7B), it  
370 becomes evident their relative position: in the sequence 1-2 (top images), the particle  
371 (bright) is located behind the flagellum (dark) while moving to the right, while in the

372 sequence 3-4, the particle is in front (while moving to the left). The movement direction of  
373 the particle, combined with its relative position to the flagellum makes to confidently  
374 conclude a CCW spin.

375

376

377

378

379

380

381

382

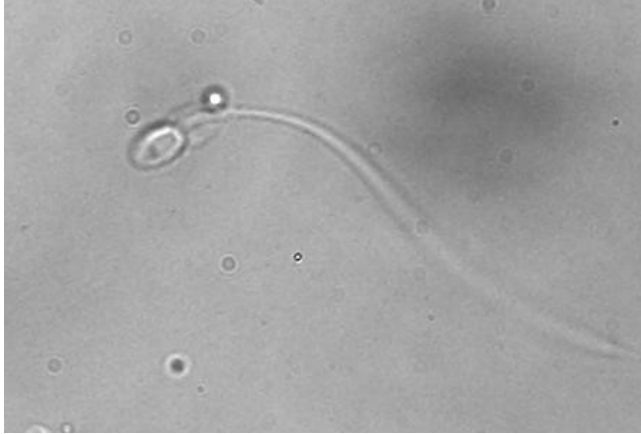

383

384 Video 2. A sperm cell with a transluclid particle rigidly attached to its neck, whilst spinning  
385 360 degrees during free-swimming motion.

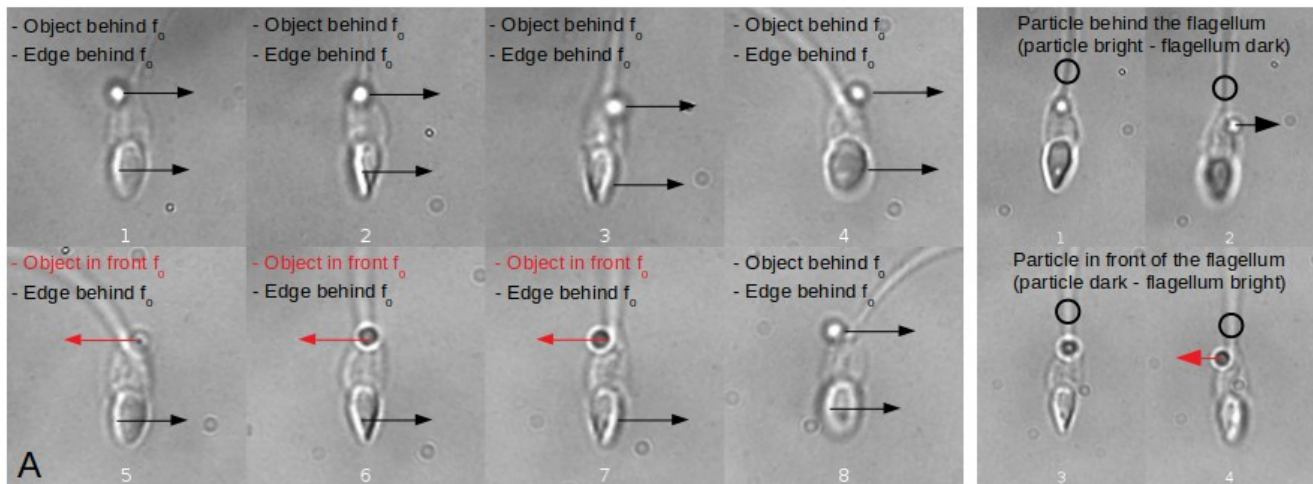

386 Figure 7. Tracking a translucent particle stuck on a spermatozoon's neck, presenting the  
387 contrast inversion optical effect while turning 360 degrees with a free-swimming sperm. (A)  
388 Focal plane between Particle and Bright border: when the particle is above the  
389 spermatozoon's neck it appears bright (behind the focal plane), while appearing dark when  
390 under the neck (in front of the focal plane); simultaneously, the border of the spermatozoon  
391 is always behind the focal plane appearing bright, showing a CCW spin direction when  
392 seen from head-to-tail. Note the change of direction of the particle when it is dark, as the  
393 particle rigidly follows the head spinning. (B) Focal plane between Particle and Flagellum:  
394 when the focal plane is placed between the particle and the flagellum, it becomes evident  
395 their relative position: in the sequence 1-2 (top images), the particle (bright) is located  
396 behind the flagellum (dark) while moving to the right, while in the sequence 3-4, the  
397 particle is in front (while moving to the left). A CCW spin is evident from these images. This  
398 shows that the proposed method is capable of detecting spinning directions.

399 **f) Detection of sperm head spin direction from multifocal stacks**

400 Here, we exploit the volume stack and accumulate the contrast-switch caused by the head  
401 inclination occurring at different focal planes by integrating this multifocal plane information  
402 in a single image. This circumvents the fact that the contrast switch across the sperm head  
403 is only observable for a few focal planes, as shown above. To this purpose, we calculated  
404 a 2D Maximum Intensity Projection (MIP) image (Schindelin et al., 2012) for each piezo  
405 rising slope z stack containing 50 focal planes through the whole acquisition time of 3.5  
406 sec. The 2D MIP of the z-stack accumulates in a single image the maximum values of all  
407 the focal planes, i.e. bright regions in the image shown in Figure 6 for a time sequence.  
408 The integrated bright region induced by the switch in contrast when the sperm head is  
409 inclined is manifested as a superimposed one-sided halo, only present when the sperm  
410 head is inclined relative to the objective lens (images 4-7). Figure 8 shows the  
411 accumulated bright region moving from left-to-right relative to the head as time progresses  
412 from time sequence 4-7 (see also Video 3). The motion of the accumulated MIP bright  
413 feature over the course of time follows the direction of head spinning, as demonstrated in  
414 previous sections.

415

416

417

418

419

420

421

422

423

424

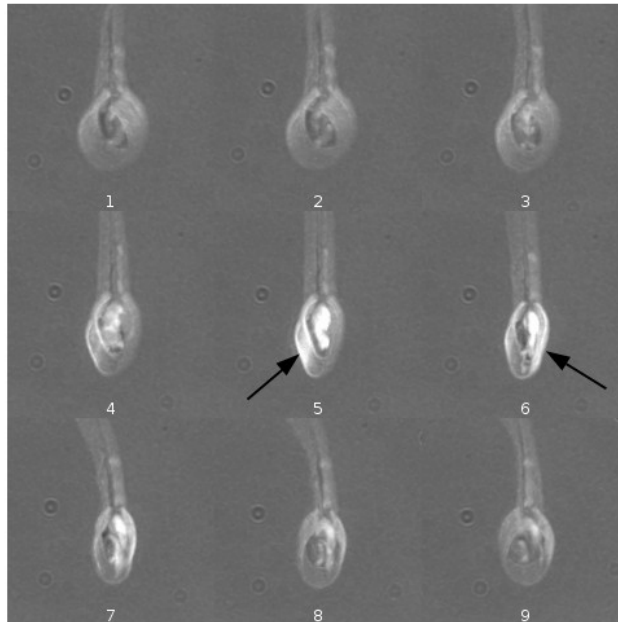

425 Figure 8. 2D MIP's (Maximum Intensity Projections) of 9 consecutive piezo rising slopes -  
426 timepoints- (50 images each projection, images 1 to 9) during a half turn of a sperm head  
427 (left to right, top to bottom). The brightest pixels over the z axis from 50 images  
428 corresponding to one half cycle of the piezo device are projected into a single plane to  
429 integrate the spherical aberration spread over the z range. The bright region moves from  
430 left-to-right relative to the sperm head (arrows) (See Video 3).

431

432

433

434

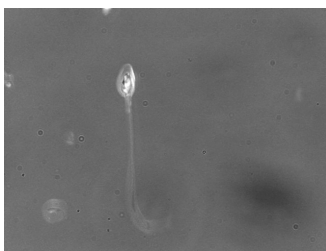

435 Video 3. The 2D MIP of the z-stack accumulates in a single image the maximum values of  
436 all the focal planes, i.e. bright regions for a time sequence. A bright region moves from  
437 right-to-left relative to the head as time progresses. At the final part of the video, another  
438 spermatozoon appears swimming in the opposite direction, showing the bright region to  
439 move consistently in the inverse direction (see also Supporting Information and Figure S1).



440 The directional motion of the superimposed bright regions is extracted from the variations  
441 on the intensity profile moving along the segment **bb'** (red line shown in Figure 9). To  
442 detect the direction of the movement in which the one-side bright halo moves with respect  
443 to the longitudinal axis of the head (as placed in front of the head -viewing the sperm from  
444 the tip of the head to the flagellum-, line **C** Figure 9A), we have employed the following  
445 steps:

446

447 1) To track the sperm head position, we used the method described in (Corkidi et al.,  
448 2021). This method provides the spermatozoa dominant orientation over time (angle  $\phi$  in  
449 Figure 9A) relative to the microscope fixed frame of reference, depicted by the line **C**. The  
450 center of the sperm head over line **C** is defined as  $a$ . These two experimental parameters  
451 define the position and orientation of the major axis of the sperm head represented by **C**  
452 (see Corkidi et al., 2021). By construction, **C'** is perpendicular to **C**, and the intersection  
453 point is at a distance of  $d$   $\mu\text{m}$  from  $a$  ( $1/3$  the average size of the long axis of the human  
454 sperm head). Finally, **b** and **b'** are located symmetrically along **C'** at a distance **b** from the  
455 intersection of **CC'**. The pixels along **bb'** (represented by the red line) are used to measure  
456 the intensity profile over the 2D MIP image (see Video 4). The direction of motion of the  
457 maximum intensity of the profile series (by using variation in position of the weighted  
458 average -see next section- along the segment **bb'**, as shown in Figure 9C and D) defines  
459 the sperm head spin direction. The equation describing the points along the line **C** is

460  $y = (\tan\phi)x + (y_a - x_a \tan\phi)$ , the intersection point between **C** and **C'** is given by the condition

461  $d = \sqrt{(x - x_a)^2 + (y - y_a)^2}$  and its coordinates  $(x_d, y_d)$ . The equation describing the points

462 along **C'** is defined by  $y' = \left(\frac{-1}{\tan\phi}\right)x' + \left(y_d + \frac{x_d}{\tan\phi}\right)$ . The points **b** and **b'** are positioned at

463 distances  $b = \pm \sqrt{(x' - x_d)^2 + (y' - y_d)^2}$  along  $\mathbf{C}'$  centered at the intersection with  $\mathbf{C}$ . The set of  
464 points that are embedded in the  $\mathbf{bb}'$  segment are  $\{\vec{r}_i\}_{i=1}^N$ , where  $N$  is the number of points  
465 belonging to  $\mathbf{bb}'$  (red line in Fig 9.). From this, the gray level profile over the segment  $\mathbf{bb}'$   
466 can be quantified.

467

468 2) Determination of the sperm head spinning direction.

469 The position of weighted average of each intensity profile along  $\mathbf{bb}'$ , while the head is  
470 turning, is quantified to establish the head spin direction. The weighted average position  
471 over  $\mathbf{bb}'$  is  $\vec{r}_{wa}$ , analogous to the “center of mass” of the intensity levels along  $\mathbf{bb}'$ .  
472 Tracking  $\vec{r}_{wa}$  over time reveals the movement of the brightest part of the sperm head 2D  
473 MIP. This feature applied to the gray level profile over the line segment  $\mathbf{bb}'$  (see Figure 9)

474 is expressed as:  $\vec{r}_{wa} = \frac{\sum_{i=1}^N I_{MIP,i} \vec{r}_i}{\sum_{i=1}^N I_{MIP,i}}$ , where  $I_{MIP,i}$  is the gray level value of the corresponding

475 2D MIP image  $\vec{r}_i$ . If  $\vec{r}_{wa}$  moves from  $\mathbf{b}$  to  $\mathbf{b}'$  the cell is rotating CCW and otherwise CW, as  
476 shown in Figures 5 and 9.

477 Figure 9A and B shows the segment  $\mathbf{bb}'$  positioned over the sperm head in two  
478 consecutive time points with the bright border moving from  $\mathbf{b}$  to  $\mathbf{b}'$ . The corresponding gray  
479 level of the 2D MIP profile is plotted at the bottom of each image in C-D. Figure 9E shows  
480 the values of the weighted average for two and a half head turns as shown in Video 3 and  
481 Video 4. Red circles over the first minimum and maximum correspond to the first half turn.  
482 Minima denote that the weighted average of the intensity profile is shifted towards the  $\mathbf{b}$   
483 side of the sperm head (taking  $\mathbf{b}$  (from  $\mathbf{bb}'$ ) as the origin for the profile), while maxima

484 denote the shift towards the opposite **b'** side. Figure 9F consists of the intensity profiles  
485 (**bb'**) kimage; lower dashed lines point out the bright profiles corresponding to Figures  
486 A,B,C,D denoting a 180 degrees head turn. The upper time ascending arrow from left-to-  
487 right of the kimage denotes a CCW head turn.

488

489

490

491

492

493

494

495

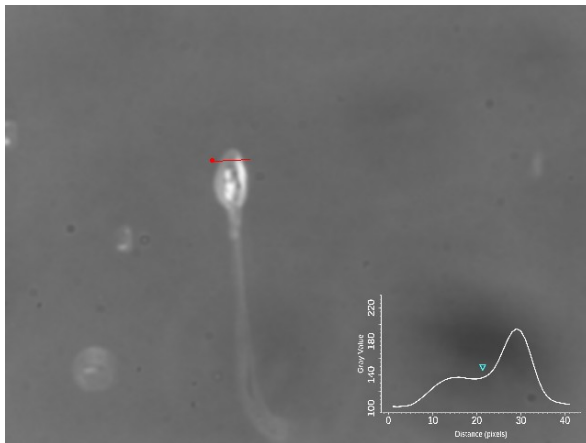

496 Video 4. Gray level of the 2D MIP profiles (over the tracked red line **bb'** from Figure 9) with  
497 its center of mass depicted in the graph by the blue triangle.

498

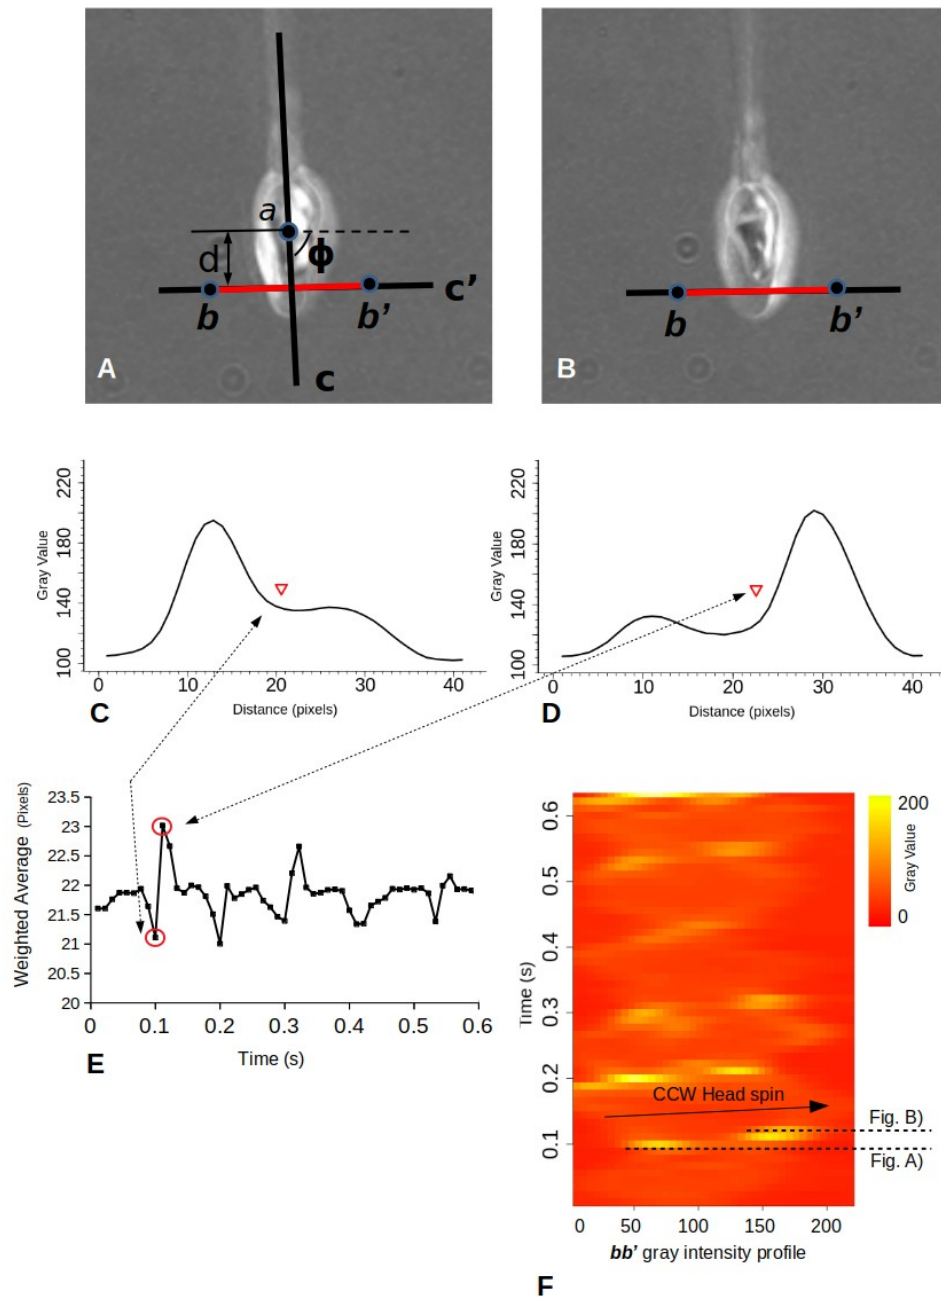

500 Figure 9. Sperm head bright region travels with a conserved direction. (A-B) The tracking  
 501 process estimates the angle  $\phi$  of the dominant direction of the spermatozoon relative to  
 502 the microscope frame of reference and defines the orientation of the sperm (line **C**, see  
 503 Corkidi et al., 2021). The straight-line **C'** is perpendicular to **C**, and the intersection point is  
 504 at a distance of  $d$   $\mu\text{m}$  from head center (1/3 the average size of the long axis of the human  
 505 sperm head). **b** and **b'** are located symmetrically along **C'** at a distance **b** from the

506 intersection of **CC'**. The coordinates of **bb'** (represented by the red line) are used to  
507 measure the intensity profile over the 2D MIP image (see Video 4). (C-D) The  
508 corresponding gray level of the 2D MIP profiles (from A-B) with its center of mass depicted  
509 by the red triangle. (E) Weighted average of 2D MIP profiles for two and a half head turns.  
510 Minima denote that the weighted average of the intensity profile is shifted towards the **b**  
511 side of the sperm head (taking **b** (from **bb'**) as the origin for the profile) while maxima  
512 denote the shift towards the opposite **b'** side. The transition from a minimum to a  
513 maximum corresponds to half a turn of the sperm head in a CCW direction (two and a half  
514 CCW turns for this series). (F) Intensity profiles (**bb'**) kymograph; dashed lines point out  
515 the bright profiles corresponding to Figures A and B denoting a 180 degrees head turn.  
516 The lower time ascending arrow show waves of the brightness level traveling from left-to-  
517 right, indicating CCW head spin when seen from head to tail.  
518

519 **g) Human sperm spin with a conserved counterclockwise direction.**

520 We acquired 409 human spermatozoa while freely swimming in 3D; 180 under non-  
521 capacitating conditions and 229 in capacitating conditions. Both groups were studied in  
522 aqueous and viscous media (see Materials and Methods). We found that in aqueous  
523 media, regardless of the medium used (non-capacitating or capacitating), all the sperm  
524 spun in the CCW when seen from head to tail and swimming freely. In contrast, in viscous  
525 and non-capacitating medium, 57% of the analyzed sperm were not spinning at all, while  
526 the remaining 43% spun in the CCW direction. Interestingly, in capacitating conditions  
527 these percentages inverted: 22% of the analyzed sperm did not spin at all, whilst 78%  
528 spun with the conserved CCW direction. The results summarized in Table 1 suggest that  
529 capacitating media also influences the ability of sperm to spin in a viscous fluid. All human  
530 sperm observed to spin did so by turning in the CCW direction when seen from head to tail  
531 regardless of the experimental condition.

532

533

Non capacitating media

Capacitating media

535

Aqueous

Viscous

Aqueous

Viscous

536 CCW

78 (100%)

65 (43%)

106 (100%)

101 (78%)

537 CW

0

0

0

0

538 No rotation

0

37 (57%)

0

22 (22%)

539

540 Table 1. Spin direction evaluation of 409 human spermatozoa while freely swimming in 3D;  
541 180 under non-capacitating conditions and 229 in capacitating conditions (both groups in  
542 aqueous and viscous media, see Materials and Methods). All human sperm in aqueous  
543 media (non-capacitating or capacitating) spun CCW direction when seen from head to tail  
544 regardless of the experimental condition, while in viscous and non-capacitating medium,  
545 57% of the analyzed sperm did not spin at all, while the remaining 43% spun in the CCW  
546 direction. Note that in capacitating conditions these percentages inverted: 22% of the  
547 analyzed sperm did not spin at all, whilst 78% spun with the conserved CCW direction.

## 548 **Discussion**

549 Sperm flagellum elastohydrodynamics, mathematical modelling and image analysis have  
550 indicated that the sperm head movement is highly dependent on the nature of forces and  
551 torques imposed by the beating flagellum and subsequent interactions with the local  
552 environment, among many other factors (Gadêlha et al., 2010; Gadêlha et al., 2019; Smith  
553 et al., 2009b; Ishimoto et al., 2017; Gaffney et al., 2011). Indeed, self-organization flagellar  
554 control models have demonstrated that mechanical attachment of the head (clamped or  
555 hinged head conditions) can even dictate the travelling wave direction of the flagellum  
556 (Riedel-Kruse et al., 2007; Camelet and Jülicher, 2020; Oriola et al., 2017; Sartori et al.,  
557 2016). These matters highlight the critical importance of directly establishing the head  
558 movement and its rotations in 3D. Furthermore, despite this critical importance and recent  
559 advances in high-speed 3D imaging and 3D microscopy, for decades there is still no  
560 consensus as to what direction human sperm spin during free-swimming motion (Muschol  
561 et al., 2018). Reports include observations of: mono-directed CW or CCW (Linnet, 1979;  
562 Smith et al., 2009b; Phillips, 1983; Woolley, 1977), bi-directed (Ishijima et al., 1992;  
563 Dardikman-Yoffe et al., 2020; Drake, 1974), and even intermittently directed head spinning  
564 (Bukatin et al., 2016). Against this background, direct detection of sperm head spinning  
565 direction and its methodology are still lacking in the literature.

566 Phillips, 1983 has suggested that mammalian sperm spinning direction could be easily  
567 detected with 2D bright field microscopy, by exploiting the fact that the sperm head is  
568 flattened, and thus produces blinking “flashes of light” as the head spins around its  
569 swimming axis (Phillips, 1997). It has been observed that the ‘flash of light’ travels from  
570 left-to-right when the sperm head-to-tail is aligned with the vertical axis (similarly to the  
571 sperm head orientation depicted Figure 2, and thus CW head spin was inferred. This  
572 however postulates that such ‘flash of light’ *moves in the same direction as the sperm*



573 *head spinning*. We have demonstrated here this to be inconsistent with direct detection of  
574 the head spinning, see Figure 7. Instead, we have found that the true head spinning  
575 direction is opposite to the observed left-to-right movement of this “flash of light”, which  
576 similarly to Phillips, 1983 also moves from left-to-right, as depicted in Figure 7. We have  
577 shown that this mismatch of movement between optical brightness and the object spinning  
578 motion is accounted for by spherical aberration effects of the lens. Furthermore,  
579 translucent objects, such as the sperm head, are equally prone to perception bistabilities  
580 Liu et al., 2012 that equally obscure the true head spinning direction with 2D microscopy,  
581 in addition to other unknown image inversions within microscopy systems (see Methods).  
582 These uncertainties, together with the combined use of 2D views of the sperm’s head  
583 trajectory as a proxy to derive flagellar beat information, may have significantly contributed  
584 to the contradictory observations that are documented in the literature regarding the sperm  
585 head spinning direction.

586 In the present study, we evaluated the head spinning direction of more than 400  
587 spermatozoa. Sperm suspended under four conditions were tested: in non-capacitating  
588 and capacitating solutions of normal and high viscosity. The high viscosity value was  
589 chosen to emulate that of the female cervical mucus (see Methods and Suarez, 2016) and  
590 sperm were incubated in capacitating media for 6 hours. One hundred percent of the  
591 spinning spermatozoa, in all experimental conditions, spun CCW, as seen from head-to-  
592 tail. It is important to mention that the spinning direction of each single spermatozoon was  
593 evaluated for a mean time of 3.4 s. A longer temporal analysis would be desirable to  
594 evaluate whether spinning direction changes over periods longer than 3 sec, though  
595 unfortunately not possible with our present high-resolution 4D set-up. Taken altogether, the  
596 analyzed time of the 409 free-swimming sperm totalled 23 minutes, with no directional  
597 change observed. Human spermatozoa in aqueous media, independently of their

598 capacitation state, all spun CCW. In contrast, in high viscosity, 57 % of spermatozoa in  
599 non-capacitating media did not spin at all, and interestingly most of them recovered their  
600 CCW rotation (80 %) when incubated in capacitating media. This striking head spinning  
601 recovery phenomenon, as well as how sperm head spinning motion and flagellar rolling  
602 influence swimming trajectories in 3D remain to be fully explored.

603

## 604 **Conclusions**

605

606 We studied here a half-century old problem by exploiting unique switch in contrast due to  
607 spherical aberration effect in brightfield microscopy. We have shown that 2D microscopy  
608 alone cannot distinguish spinning direction in axis-symmetric, streamlined, translucent  
609 human swimming sperm; as well, methods employing such imaging technique may need  
610 reassessment, whilst no methodology are currently available to directly measure human  
611 head spinning. Indeed, previous studies mostly used visual inspection from video-  
612 microscopy images or indirect measurement using flagellar tracing in 3D. We showed that  
613 contrast inversion can be exploited to track head spinning but this requires finding the  
614 appropriate focal plane in which the sperm head is, centred exactly at the focal plane; a  
615 challenging task for freely-swimming spermatozoa as the head moves up and down during  
616 cell progression. This is resolved by using a multi-plane detection system. The  
617 methodology was validated as coherence and consistence prevailed between optics  
618 theory and direct tracking of different sperm cells with particles attached to neck and head.  
619 We have observed that human sperm head spins with a robust, conserved, and  
620 recoverable counterclockwise spinning direction (when viewed from head to tail). Our  
621 observations reconcile structural information of mammalian sperm that observe flagellar  
622 architecture with conserved chirality in the axonemal driving unit with a conserved direction

623 of spinning for human sperm, regardless of viscosity and capacitating conditions. The  
624 ability of human sperm to fertilize may be intimately related with head spinning, as  
625 capacitating medium were observed to excite a larger proportion of the population to spin.  
626 At last, the proposed methods can be applied to other free spinning objects and  
627 microorganisms that possess similar axis-symmetric body architecture to human  
628 spermatozoa.

629

## 630 **Materials and Methods**

### 631 ***Ethical approval for the human semen samples***

632 The bioethics committee of the Institute of Biotechnology, UNAM approved the proposed  
633 protocols for the handling of human semen samples. Donors were properly informed  
634 regarding the experiments to be performed and each donor signed and agreed to a  
635 consent form. All samples fulfilled World Health Organization requirements for normal  
636 fertile semen samples.

### 637 ***Media***

638 HTF (human tubal fluid) medium was used in this study. Non-capacitating HTF (pH 7.4)  
639 contained (mM): 4.7 KCl, 0.3 KH<sub>2</sub>PO<sub>4</sub>, 90.7 NaCl, 1.2 MgSO<sub>4</sub>, 2.8 Glucose, 1.6 CaCl<sub>2</sub>, 3.4  
640 sodium pyruvate, 60 sodium lactate and 23.8 HEPES. Capacitating medium (pH 7.4) was  
641 HTF medium supplemented with 5 mg/ml BSA and 2 mg/ml NaHCO<sub>3</sub>. Capacitating  
642 recording medium (pH 7.4) was only supplemented with 2 mg/ml NaHCO<sub>3</sub>, BSA was not  
643 added. For viscous medium, 1% methyl cellulose was added to the non-capacitating or  
644 capacitating recording medium, depending on the experimental condition.

### 645 ***Biological preparations***

646 Semen samples were obtained by masturbation from healthy donors after 48 h of sexual  
647 abstinence. Highly motile sperm were recovered after the swim-up protocol. Briefly, 300  $\mu$ l  
648 of semen were placed in a test tube, then 1 ml of non-capacitating or capacitating medium,  
649 depending on the experimental condition, was added on top. Tubes were incubated at a  
650 45° angle, at 37°C in a humidified atmosphere of 5% CO<sub>2</sub> and 95% air during 1 h. Then,  
651 sperm from the medium on top were collected and concentration was adjusted to 10<sup>6</sup> cells/  
652 ml. To promote *in vitro* capacitation, sperm in capacitating medium were incubated for an  
653 additional 5 h. Recordings were performed in (a) non-capacitating aqueous and viscous  
654 medium, and (b) capacitating aqueous or viscous medium.

### 655 **Sperm samples**

656 A total of 409 freely swimming spermatozoa (30 samples -one per day- from 9 different  
657 donors) were analyzed: (a) 180 non-capacitated (78 in aqueous media and 102 in viscous  
658 media) and (b) 229 in capacitating media (106 in aqueous media and 123 in viscous  
659 media).

660

### 661 **3D Imaging Microscopy**

662

663 Multifocal plane stacks were acquired with the system originally described in Corkidi et al.,  
664 2008, consisting on an inverted Olympus IX71 microscope, mounted on an optical table  
665 [TMC (GMP SA, Switzerland)], reconfigured with a piezoelectric device P-725 (Physik  
666 Instrumente, MA, USA) which periodically displaces a high magnification 100x objective  
667 (Olympus UPlanSApo 100x/1.4 na oil objective) at a frequency of 80Hz with a z  
668 displacement of 20  $\mu$ m. A high-speed camera NAC Q1v (Nac Americas, Inc., USA)  
669 acquired images at a rate of 8000 fps with 640 x 480 pixels resolution. Every rising  
670 movement of the piezo device (half cycle i.e., 1/160 sec) contains 50 different focal planes

671 (1 image per focal plane). The high-speed camera can store 28,000 images (RAM is 8 Gb)  
672 per cell, thus recording spinning motion for a total of 3.5 seconds. Since in this work the  
673 rotation of the sperm head is a critical aspect, every possible inversion in each single  
674 element conforming the optical-electronical pipeline's path had to be carefully considered  
675 (inverted microscope, camera driver setup, image processing software and for  
676 visualization -Fiji, Matlab, Paraview, etc.-). As a control test, we have placed in the  
677 microscope stage (using a 4x objective) a known pattern (a character R in a piece of  
678 paper) viewing the front face of the objective (upside down if seen by the top of the  
679 microscope). We have verified that the character appeared upright in the computer screen  
680 and that it moved accordingly with the horizontal and vertical stage movements (seen the  
681 stage from the bottom-top direction where the objective is placed).

682

## 683 **Acknowledgements**

684 The authors thank Paulina Torres for helpful assistance with experimental procedures and  
685 Shirley Ainsworth for bibliographic support. The help of Juan Manuel Hurtado, Roberto  
686 Rodríguez, Omar Arriaga and Arturo Ocádiz regarding computer services is  
687 acknowledged.

## 688 **Competing interests**

689 The authors declare that no competing interests exist.

## 690 **Funding**

691 The following grantig institutions are acknowledged for their support: Consejo Nacional de  
692 Ciencia y Tecnología (CONACyT-Mexico), grants 255914 and Fronteras; Dirección  
693 General de Asuntos del Personal Académico/ Universidad Nacional Autónoma de México  
694 (DGAPA/ UNAM), grants: IN200919 to AD; IN105222 to GC. PH acknowledges support  
695 from Chan Zuckerberg Initiative DAF Grant (2020-225643) and HG from DTP Engineering  
696 and Physical Sciences Research Council.

#### 697 **Author contributions**

698 Conception and design: G.C., F.M., H.G., A.D.; Acquisition of data: G.C., F.M., A-L.G.-C.,  
699 Methodology: G.C., F.M., P.H.-H., A-L.G.-C, B.N.C., H.G., A.D.; Software: G.C., F.M.,  
700 P.H.-H., B.N.C.; Resources: G.C., A.D.; Writing - review & editing: G.C., F.M., B.N.C.,  
701 H.G., A.D.; Supervision, funding and project administration: G.C., A.D.

#### 702 **Ethics**

703 The bioethics committee of the Institute of Biotechnology, UNAM approved the proposed  
704 protocols for the handling of human semen samples. Donors were properly informed  
705 regarding the experiments to be performed and each donor signed and agreed to a  
706 consent form. All samples fulfilled World Health Organization requirements for normal  
707 fertile semen samples.

708

## References

- Bishop DW. 1958. Motility of the Sperm Flagellum. *Nature* 182:1638-1640. <https://doi.org/10.1038/1821638a0>
- Blokhuis EWM. 1961. Optical Investigations on the Movement of Bull Spermatozoa. In: *Proceedings of 4th International Congress on Animal Reproduction, The Hague* 2:243-248.
- Bukatin A, Kukhtevich I, Stoop N, Dunkel J, Kantsler V. 2015. Bimodal rheotactic behavior reflects flagellar beat asymmetry in human sperm cells. *PNAS* 112:15904–15909. <https://doi.org/10.1073/pnas.1515159112>
- Bukatin A, Kukhtevich I, Stoop N, Dunkel J, Kantsler V. 2016. Bimodal rheotactic behavior reflects flagellar beat asymmetry in human sperm cells. *PNAS* 112:15904–15909. <https://doi.org/10.1073/pnas.1515159112>
- Camelet S, Jülicher F. 2000. Generic aspects of axonemal beating. *New Journal of Physics* 2:24.1-24.3. [https://www.pks.mpg.de/fileadmin/user\\_upload/MPIPKS/group\\_pages/BiologicalPhysics/juelicher/publications/2000-2003/nj0124.pdf](https://www.pks.mpg.de/fileadmin/user_upload/MPIPKS/group_pages/BiologicalPhysics/juelicher/publications/2000-2003/nj0124.pdf)
- Corkidi G, Hernández-H P, Montoya F, Gadêlha H, Darszon A. 2021. Long-term segmentation-free assessment of head–flagellum movement and intracellular calcium in swimming human sperm. *Journal of Cell Science* 134:jcs250654. <https://doi.org/10.1242/jcs.250654>
- Corkidi G, Taboada B, Wood CD, Guerrero A, Darszon A. 2008. Tracking Sperm in Three Dimensions. *Biochemical and Biophysical Research Communications* 373:125–129. <https://doi.org/10.1016/j.bbrc.2008.05.189>
- Daloglu MU, Luo W, Shabbir F, Lin F, Kim K, Lee I, Jiang JQ, et al.. 2018. Label-Free 3D Computational Imaging of Spermatozoon Locomotion, Head Spin and Flagellum Beating over a Large Volume. *Light: Science & Applications* 7:17121–17121. <https://doi.org/10.1038/lsa.2017.121>
- Dardikman YG, Mirsky S, Barnea I, Shaked NT. 2020. High-resolution 4-D acquisition of freely swimming human sperm cells without staining. *Science Advances* 6:eaay7619. <https://doi.org/10.1126/sciadv.aay7619>
- David G, Serres C, Jouannet P. 1981. Kinematics of Human Spermatozoa. *Gamete Research* 4:83-95. <https://doi.org/10.1002/mrd.1120040202>
- Denehy MA, Herbison-evans D, Denehy BV. 1975. Rotational and Oscillatory Components of the Tailwave in Ram Spermatozoa. *Biology of Reproduction* 13:289-297. <https://doi.org/10.1093/biolreprod/13.3.289>
- Drake AD. 1974. Observations on bull sperm rotation. *Biology of Reproduction* 10:78-84. <https://doi.org/10.1095/biolreprod10.1.78>
- Fawcett DW. 1975. The Mammalian Spermatozoon. *Developmental Biology* 44:394–436. [https://doi.org/10.1016/0012-1606\(75\)90411-X](https://doi.org/10.1016/0012-1606(75)90411-X)
- Gadêlha H, Gaffney EA, Smith DJ, Kirkman-Brown JC. 2010. Nonlinear instability in flagellardynamics: A novel modulation mechanism in sperm migration?. *Journal of The Royal Society Interface* 7:1689-1697. [10.1098/rsif.2010.0136](https://doi.org/10.1098/rsif.2010.0136)
- Gadêlha H, Gaffney EA. 2019. Flagellar ultrastructure suppresses buckling instabilities and enables mammalian sperm navigation in high-viscosity media. *Journal of The Royal Society Interface* 16:20180668. <https://doi.org/10.1098/rsif.2018.0668>
- Gadêlha H, Hernández-Herrera P, Montoya F, Darszon A, Corkidi G. 2020. The human sperm beats anisotropically and asymmetrically in 3D. *Science Advances* sciadv.aba5168. <https://doi.org/10.1126/sciadv.aba5168>
- Gaffney EA, Gadêlha H, Smith DJ, Blake JR, Kirkman-Brown JC. 2011. Mammalian sperm

motility: Observation and theory. *Annual Review of Fluid Mechanics* 43:501-528.  
<https://www.annualreviews.org/doi/abs/10.1146/annurev-fluid-121108-145442>

Goodman J. 2005. *Introduction to Fourier optics*. McGraw-Hill 3rd ed:.

Hernandez HO, Hernandez-H P, Montoya F, Olveres J, Bloomfield-G H, Darszon A, Escalante-R B, Corkidi G. 3D+t feature-based descriptor for unsupervised flagellar human sperm beat classification 2022488-492doi:10.1109/EMBC48229.2022.9871419

Ishijima S, Hamaguchi MS, Naruse M, Ishijima SA, Hamaguchi Y. 1992. Rotational movement of a spermatozoon around its long axis. *Journal of Experimental Biology* 163:15–31.

Ishimoto K, Gadêlha H, Gaffney EA, Smith DJ, Kirkman-Brown J. 2017. Coarse-graining the fluid flow around a human sperm. *Physical Review Letters* 118:124501.  
<https://doi.org/10.1103/PhysRevLett.118.124501>

Keller HE, Spring KR, Flynn BO, Davidson MW. 2022. Focus depth and spherical aberration. Olympus Microscopy Resource Centre :. <https://www.olympus-lifescience.com/en/microscope-resource/primer/java/aberrations/pointspreadaberration/>

Kidger MJ. 2002. *Fundamental Optical Design*. :

Lee S-H, Grier DG. 2007. Holographic microscopy of holographically trapped three-dimensional structures. *Optics Express* 15:1505-1512. [https://DOI: 10.3109/01485017908987307](https://DOI:10.3109/01485017908987307)

Leung MR, Roelofs MC, Ravi RT, Maitan P, Henning H, Zhang M, Bromfield EG, et al.. 2021. The Multi-Scale Architecture of Mammalian Sperm Flagella and Implications for Ciliary Motility. *The EMBO Journal* 40:e107410. <https://doi.org/10.15252/embj.2020107410>

Linnet L. 1979. Human Spermatozoa: Unidirectional Rotation of the Tail as Indicated by Head-to-Head Agglutinates. *Archives of Andrology* 2:157-161. <https://10.3109/01485017908987307>

Liu CH, Tzeng OJL, Hung DL, Tseng P, Juan CH. 2012. Investigation of bistable perception with the “silhouette spinner”: Sit still, spin the dancer with your will. *Vision Research* 60:34-39. <https://doi.org/10.1016/j.visres.2012.03.005>

Miller MR, Kenny SJ, Mannowetz N, Mansell SA, Wojcik M, Mendoza S, Zucker RS, Xu K, Lishko PV. 2018. Asymmetrically Positioned Flagellar Control Units Regulate Human Sperm Rotation. *Cell Reports* 24:2606–2613. <https://doi.org/10.1016/j.celrep.2018.08.016>

Muschol M, Wenders C, Wennemuth G. 2018. Four-dimensional analysis by high-speed holographic imaging reveals a chiral memory of sperm flagella. *PLoS ONE* 13:e0199678. <https://doi.org/10.1371/journal.pone.0199678>

Oriola D, Gadêlha H, Casademunt J. 2017. Nonlinear amplitude dynamics in flagellar beating. *Royal Society Open Science* 4:160698.  
<https://royalsocietypublishing.org/doi/pdf/10.1098/rsos.160698>

Phillips DM Direction of Rolling in Mammalian Spermatozoa 1983. André, J. (eds) Springer, Dordrecht . [https://doi.org/10.1007/978-94-009-7675-7\\_63](https://doi.org/10.1007/978-94-009-7675-7_63)

Phillips DM Direction of Rolling of Squirrel Spermatozoa 1997. In: Motta, PM 2nd International Malpighi Symposium 47-50.

Phillips DM. 1972. Comparative Analysis of Mammalian Sperm Motility. *The Journal of Cell Biology* 53:561-573. <https://doi.org/10.1083/jcb.53.2.561>

Pimentel JA, Carneiro J, Darszon A, Corkidi G. 2012. A segmentation algorithm for automated tracking of fast swimming unlabelled cells in three dimensions. *Journal of Microscopy* 245:72-81. [10.1111/j.1365-2818.2011.03545.x](https://doi.org/10.1111/j.1365-2818.2011.03545.x)

Powar S, Yazdan PF, Nandagiri A, Gaikwad AS, Potter DL, O’Byryan MK, Prabhakar R, Soria J, Nosrati R. 2022. Unraveling the Kinematics of Sperm Motion by Reconstructing the Flagellar Wave Motion in 3D. *Small Methods* 6:2101089. <https://doi.org/10.1002/smt.202101089>

Riedel-Kruse IH, Hilfinger A, Howard J, Jülicher F. 2007. How molecular motors shape the flagellarbeat. *HFSP Journal* 1:192-208. <https://doi.org/10.2976/1.2773861>

Rikmenspoel R. 1965. The Tail Movement of Bull Spermatozoa: Observations and Model Calculations. *Biophysical Journal* 5:365-392. [https://doi.org/10.1016/S0006-3495\(65\)86723-6](https://doi.org/10.1016/S0006-3495(65)86723-6)



Sartori P, Geyer VF, Scholich A, Jülicher F, Howard J. . Dynamic curvature regulation accounts for the symmetric and asymmetric beats of *Chlamydomonas flagella*. *eLife* 5:e13258. <https://doi.org/10.7554/eLife.13258>

Schindelin J, Arganda-C I, Frise E, Kaynig V, Longair M, Pietzsch T, ... Cardona A. 2012. Fiji: an open-source platform for biological-image analysis. *Nature Methods* 9:676-682. doi:10.1038/nmeth.2019

Silva-Villalobos F, Pimentel A, Darszon A, Corkidi G. 2014. Imaging of the 3D dynamics of flagellar beating in human sperm. *Engineering in Medicine and Biology Society (EMBC), 2014 36th Annual International Conference of the IEEE* :190 - 193. DOI: 10.1109/EMBC.2014.6943561

Smith D, Gaffney E, Blake J, Kirkman-Brown J. 2009. Human sperm accumulation near surfaces: A simulation study. *Journal of Fluid Mechanics* 621:289-320. <https://doi.org/10.1017/S0022112008004953>

Smith DJ, Gaffney EA, Gadêlha H, Kapur N, Kirkman-Brown JC. 2009. Bend Propagation in the Flagella of Migrating Human Sperm, and Its Modulation by Viscosity. *Cell Motility and the Cytoskeleton* 66:220-236. <https://doi.org/10.1002/cm.20345>

Suarez SS. 2016. Mammalian sperm interactions with the female reproductive tract . *Cell and Tissue Research* 363:185-194. <https://doi.org/10.1007/s00441-015-2244-2>

Wilson L, Zhang R. 2012. 3D localization of weak scatterers in digital holographic microscopy using Rayleigh-Sommerfeld back-propagation. *Optics Express* 20:16735–16744.

Woolley DM Interpretations of the pattern of sperm tail movements 1979. ed. D. W. Fawcett and J. M. Bedford Baltimore-Munich: Urban& Schwarzenberg 69-79.

Woolley DM, Osborn IW. 1984. Three-Dimensional Geometry of Motile Hamster Spermatozoa. *Journal of Cell Science* 67:159-170. <https://doi.org/10.1242/jcs.67.1.159>

Woolley DM. 1977. Evidence for ‘Twisted Plane’ Undulations in Golden Hamster Sperm Tails. *The Journal of Cell Biology* 75:851-865. <https://doi.org/10.1083/jcb.75.3.851>

Yanhe Z, Wang H, Wiesehoefer C, Shah NB, Reetz E, Hwang JY, Huang X, et al.. 2022. 3D Structure and in Situ Arrangements of CatSper Channel in the Sperm Flagellum. *Nature Communications* 13:3439. <https://doi.org/10.1038/s41467-022-31050-8>

Yeung, CH, Woolley DM. 1984. Three-dimensional bend propagation in hamster sperm models and the direction of roll in free-swimming cells. *Cell Motil.* 4:215-226. <https://doi.org/10.1002/cm.970040306>

Zaferani M, Javi F, Mokhtare A, Li P, Abbaspourrad A. 2021. Rolling controls sperm navigation in response to the dynamic rheological properties of the environment. *eLife* 10:e68693. <https://doi.org/10.7554/eLife.68693>

710

711

## 712 **Supporting Information**

### 713 **Invariance of the method to sperm orientation**

714

715 To investigate whether the direction of sperm rotation is not an artifact of the illumination

716 setup of the microscope i.e., that the bright border of the sperm head edge is not an effect

717 of the illumination setup, we analyzed the rotation of non-capacitated sperm swimming in

718 four different directions in a Cartesian plane. As we explained previously, in the sequence

719 shown in Figure 6, it is clearly seen that the border of the narrowest part of the head is  
720 naturally marked with a bright composed semi-circle. This bright feature turns in the  
721 direction of the sperm head (note that this bright border is located behind the sperm head,  
722 as explained before). We have verified that independently of the swimming trajectory of  
723 sperm, the evolution on time of this bright semi-circle clearly defines the rotating direction  
724 of the sperm head. Supplementary Figure S1 shows two consecutive time-points of 4  
725 different sperm with outgoing trajectories from the center of each of four Cartesian planes.  
726 As can be seen in this figure, the bright region (due to the optical spherical aberration  
727 contrast inversion effect) in each sperm always appears first on the **b** side of the head and  
728 then it moves to the opposite **b'** side at the subsequent time-point (see Figure 9). This  
729 indicates that all the sperm rotate in a CCW (since the bright border is behind the head of  
730 the sperm) direction independently of the direction of the sperm trajectory (four quadrants).

731

732

733

734

735

736

737

738

739

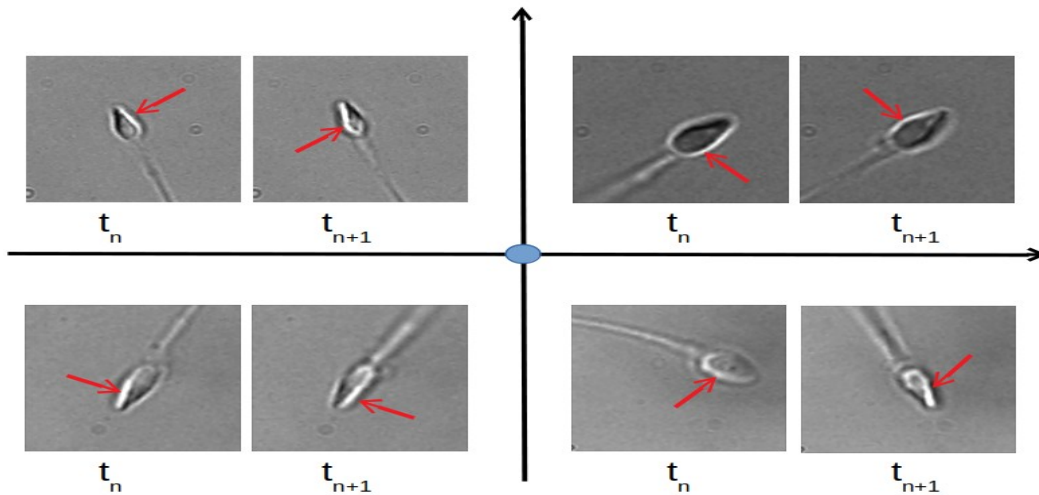

740 Figure S1. Four different non-capacitated sperm with outgoing trajectories from the center  
741 of each of the four Cartesian planes (blue circle). Two different time-points ( $t_n$  and  $t_{n+1}$ ) are  
742 shown for each sperm. The bright region (due to the optical spherical aberration contrast  
743 inversion effect) always appears first in the left side of the head and then moves to the  
744 right side at the subsequent time-point (from head to tail) indicating a CCW head spinning  
745 as shown in Results. The red arrows indicate the bright border in each image.
